# Supplementary material
Source: publisher figshare collection journal article supplement (https://acs.figshare.com/ndownloader/files/8723428)
Supplement: Supplementary file 1 [file 8723428]

## Supporting Information

# Metabolomics Analysis of Effects of Commercial Soy-based Protein Products in Red Drum (*Sciaenops ocellatus*)

*Fabio Casu<sup>†</sup>, Aaron M. Watson<sup>‡</sup>, Justin Yost<sup>‡</sup>, John W. Leffler<sup>‡</sup>, Thomas Gibson Gaylord<sup>§</sup>,  
Frederic T. Barrows<sup>#</sup>, Paul A. Sandifer<sup>¶1</sup>, Michael R. Denson<sup>‡</sup>, and Daniel W. Bearden<sup>†\*</sup>*

<sup>†</sup> Hollings Marine Laboratory, National Institute of Standards and Technology, Chemical Sciences Division, 331 Fort Johnson Road, Charleston, South Carolina 29412, U.S.A.

<sup>‡</sup>Marine Resources Research Institute, South Carolina Department of Natural Resources, 217 Fort Johnson Road, Charleston, South Carolina 29412, U.S.A.

<sup>§</sup>Bozeman Fish Technology Center, United States Fish and Wildlife Service, 4050 Bridger Canyon Road, Bozeman, Montana 59715, U.S.A.

<sup>#</sup>United States Department of Agriculture, Agricultural Research Service, Hagerman Fish Culture Experiment Station, 3059F National Fish Hatchery Road, Hagerman, Idaho 83332, U.S.A.

<sup>¶</sup>Hollings Marine Laboratory, National Oceanic and Atmospheric Administration, 331 Fort Johnson Road, Charleston, South Carolina 29412, U.S.A.

**Corresponding Author**

\*Phone: (843) 762-8865. Fax: (843) 762-8742. E-mail: dan.bearden@nist.gov.

<sup>1</sup>Present address: Hollings Marine Laboratory, College of Charleston, 331 Fort Johnson Road, Charleston, South Carolina 29412, U.S.A.

## SUPPORTING INFORMATION

### TABLE OF CONTENTS

|                                                                   |            |
|-------------------------------------------------------------------|------------|
| <b>Part I: Experimental Procedures .....</b>                      | <b>S4</b>  |
| Animal Husbandry .....                                            | S4         |
| Plasma Collection and Metabolite Extraction for NMR analysis..... | S5         |
| Metabolomics Quality Control Findings .....                       | S6         |
| NMR Spectroscopy Data Acquisition Details .....                   | S6         |
| <b>Part II: Supporting Figures .....</b>                          | <b>S8</b>  |
| Figure S1.....                                                    | S8         |
| Figure S2.....                                                    | S9         |
| Figure S3.....                                                    | S10        |
| Figure S4.....                                                    | S11        |
| Figure S5.....                                                    | S12        |
| Figure S6.....                                                    | S14        |
| Figure S7.....                                                    | S16        |
| Figure S8.....                                                    | S17        |
| <b>Part III: Supporting Tables .....</b>                          | <b>S18</b> |
| Table S1.....                                                     | S18        |
| Table S2.....                                                     | S19        |
| Table S3.....                                                     | S20        |
| Table S4.....                                                     | S21        |
| Table S5.....                                                     | S22        |
| Table S6.....                                                     | S23        |
| Table S7.....                                                     | S24        |

## **Part I: Experimental Procedures**

### *Animal Husbandry*

Captive, wild red drum broodstock were volitionally spawned at the Marine Resources Research Institute (MRRI) in Charleston, South Carolina, by the South Carolina Department of Natural Resources (SCDNR). Larval fish grown from a single unique genetic family were transported and stocked into earthen ponds at the Waddell Mariculture Center (WMC, Bluffton, SC), harvested at a mean length of 30 mm and transported and held at the Marine Resources Research Institute (MRRI) in eight, 1,600 L recirculating culture tanks at 21 °C and constant salinity (30 mg/L to 32 mg/L). During this holding period, fish were fed to apparent satiation twice daily using a standard commercial feed containing 40 % crude protein and 10 % crude lipid. At the end of the holding period, fish were selected based on comparable weights and transported to an indoor, semi-recirculating seawater system where they were distributed into 24 x 1,100 L 1.52 m diameter experimental tanks at a density of 35 fish per tank. Subsequently, fish were fed twice daily to satiation on a pelleted soy-free conditioning diet (Table S1) for one month prior to the start of the experiment. Water temperature was increased by four degrees to 25 °C over a two-week period to minimize stress.

Limited water exchanges were performed as needed based on water quality parameters utilizing settled, polished seawater from the Charleston Harbor. Water temperature, salinity, dissolved oxygen, and pH were recorded two times per week using a YSI Pro Plus handheld meter (YSI, Inc., Yellow Springs, OH, USA) and total ammonia, nitrite

and nitrate were monitored weekly using a Hach spectrophotometer and reagents (Hach Company, Loveland, CO, USA) on a subset of tanks.

#### *Plasma Collection and Metabolite Extraction for NMR analysis*

Using a syringe equipped with a 22-gauge needle, 1 ml to 2 mL of blood from the fish caudal vasculature were collected into lithium heparin collection tubes and gently inverted eight times. The collection tubes were rapidly placed on ice. Blood samples were then centrifuged at 2,000 x g for 6 min at 4 °C. The top layer (plasma) was transferred into pre-labeled cryovials, flash frozen in liquid nitrogen and stored at -80 °C, until further processing.

Frozen plasma samples were thawed on ice for approximately 2 h. 400 µL of plasma per sample were loaded onto Nanosep 3 kDa molecular weight cutoff spin filters (Pall Life Sciences, Pall Corporation, Port Washington, NY, USA) that had been previously washed with Millipore DI water overnight to remove glycerol present in the filters. Filters were then centrifuged at 10000 g for 90 min at 4 °C and for up to two times an additional 30 min for samples that provided less than 200 µL of filtrate. 200 µL of filtrate were transferred into Eppendorf tubes (Eppendorf). 400 µL of NMR buffer (100 mmol/L phosphate buffer in D<sub>2</sub>O, pH 7.3, with 1.0 mmol/L TMS<sup>+</sup> as an internal NMR chemical shift standard) were added to each sample to a final volume of 600 µL, the samples were then vortexed for a few seconds and centrifuged. A total of 550 µL of the resulting solution was transferred into 5-mm NMR tubes (Bruker Biospin) for NMR analysis.

### *Metabolomics Quality Control Findings*

The median % RSD for LCM (n = 34) was 7.1 % with an interquartile range from 4.5 % to 10.8 %, while the % RSD for SRM 1946 (for liver; n = 33) was 8.9 % with an interquartile range from 4.5 % to 17.1 % (Figure S2). The median % RSD for MCM (n = 36) was 7.6 % with an interquartile range from 3.5 % to 13.9 %, while the % RSD for SRM 1946 (for muscle; n = 33) was 7.3 % with an interquartile range from 3.7 % to 13.3 % (Figure S3). The median % RSD for CP (n = 22) was 5.0 % with an interquartile range from 2.7 % to 10.2 %, while the % RSD for SRM 1950 (n = 19) was 5.1 % with an interquartile range from 2.6 % to 10.6 % (Figure S4).

### *NMR Spectroscopy Data Acquisition Details*

All NMR experiments were performed at 298 K on a Bruker Avance II 700 MHz spectrometer (Bruker Biospin) equipped with a 5 mm triple-resonance, z-gradient TCI cryoprobe. 5 mm sample tubes were placed in 96-well racks for the refrigerated holding stage SampleJet sample changer (Bruker Biospin). Spectra were collected under full automation using ICON-NMR (Bruker Biospin) with water suppression using a three-pulse sequence based on a standard one-dimensional (1D) nuclear Overhauser effect spectroscopy (NOESY) pulse sequence with presaturation (noesygprr1d). The NMR protocol included 10 min for temperature equilibration, automated shimming with on-axis and off-axis shims, automated probe tuning and pulse calibration on each individual sample. 1D  $^1\text{H}$  spectra were acquired with a spectral width of 20 ppm, a 3 s relaxation delay, 80 transients and 8 steady-state scans, collected into 65536 real data points. A

60 ms mixing period was used for solvent suppression and an acquisition time of 2.34 s for a total repetition time (D1 + AQ) of 5.34 s. The resulting spectra were processed by zero-filling to 65536 complex points and by multiplying the free induction decay by an exponential line broadening function of 0.3 Hz prior to Fourier transformation. The spectra were manually phased using Topspin 3.2 (Bruker Biospin), the baseline was automatically corrected by applying a fifth order polynomial and the chemical shift was calibrated by setting the standard TMSP peak at 0.00 ppm (also using Topspin 3.2 (Bruker Biospin)). An additional 2D homonuclear  $^1\text{H}$ - $^1\text{H}$  *J*-resolved (JRES) spectrum was collected resulting in a total NMR experiment time of approximately 45 min per sample. Samples that showed inadequate water suppression or which showed overly broad linewidth were re-run to achieve better results.

Two-dimensional edited  $^1\text{H}$ ,  $^{13}\text{C}$ -HSQC spectra with adiabatic  $^{13}\text{C}$  decoupling (hsqcedtgpsisp2.2) were collected on selected samples to aid metabolite identification. In general, 2048 data points with 128 scans and 512 increments were acquired with spectral widths of 11 ppm in F2 and 180 ppm in F1 ( $^{13}\text{C}$ ). A relaxation delay equal to 1.5 s was used between acquisitions and a refocusing delay corresponding to a 145 Hz  $^1J_{\text{C-H}}$  coupling was used. The FIDs were weighted using a shifted sine-square function in both dimensions. Manual two-dimensional phasing was applied; all spectra were referenced to the TMSP internal standard at 0.00 ppm for  $^1\text{H}$  and  $^{13}\text{C}$ .

Part II: Supporting Figures

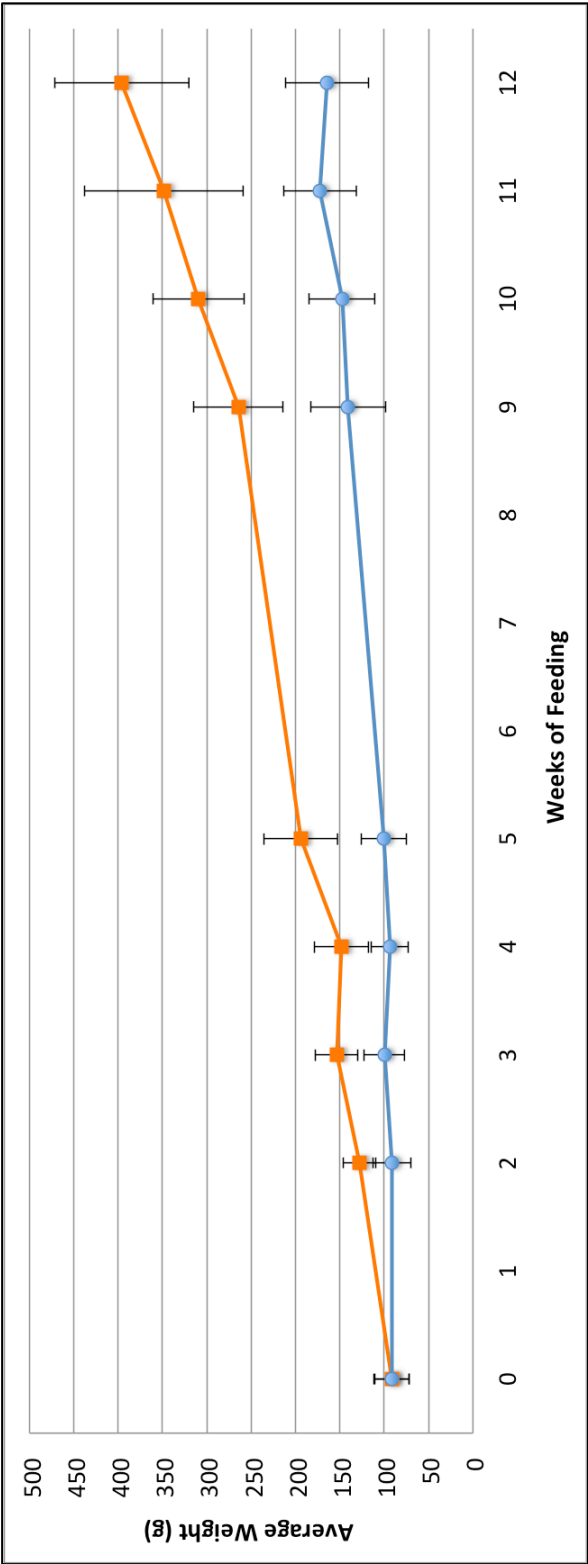

**Figure S1.** Average weights per time point of red drum fish fed either the soy-based diets (blue) or the natural diet (orange). Single data points for the soy diets are an average of the fish weights for diets #1 to #5 at each time point. Error bars represent mean  $\pm$  SD.



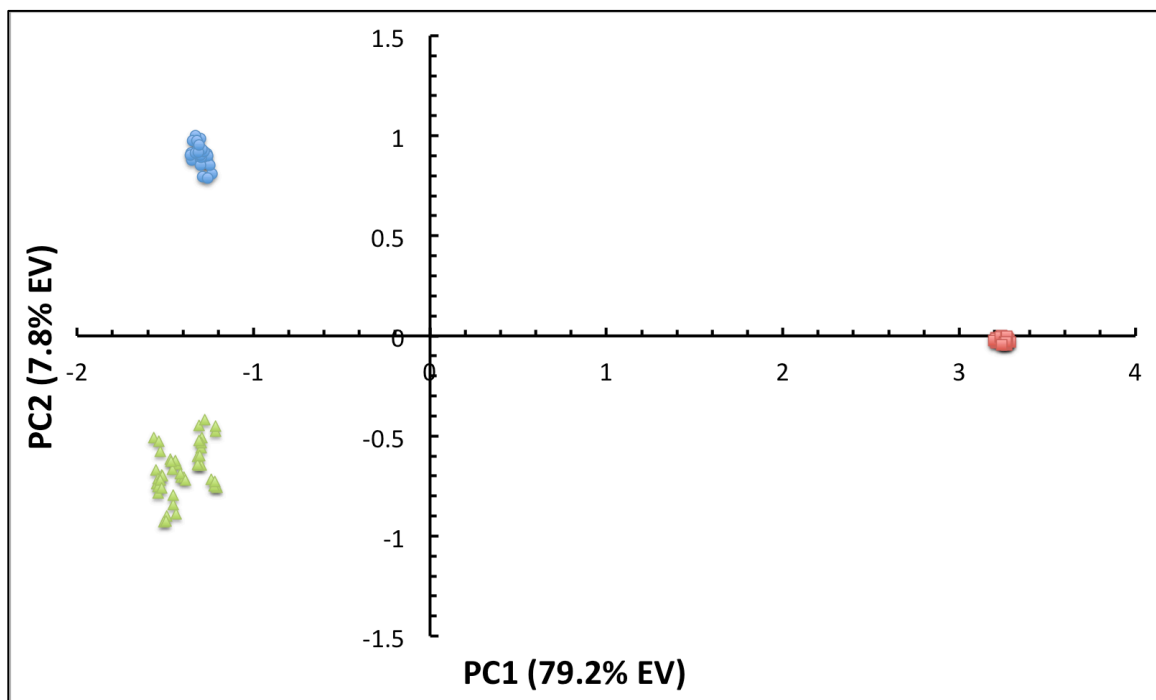

**Figure S2.** Liver QC sample PCA score plot. LCM, liver control material (blue circles;  $n = 34$ ); NIST SRM 1946, standard reference material (red squares;  $n = 33$ ). Technical replicate samples are displayed as green triangles.

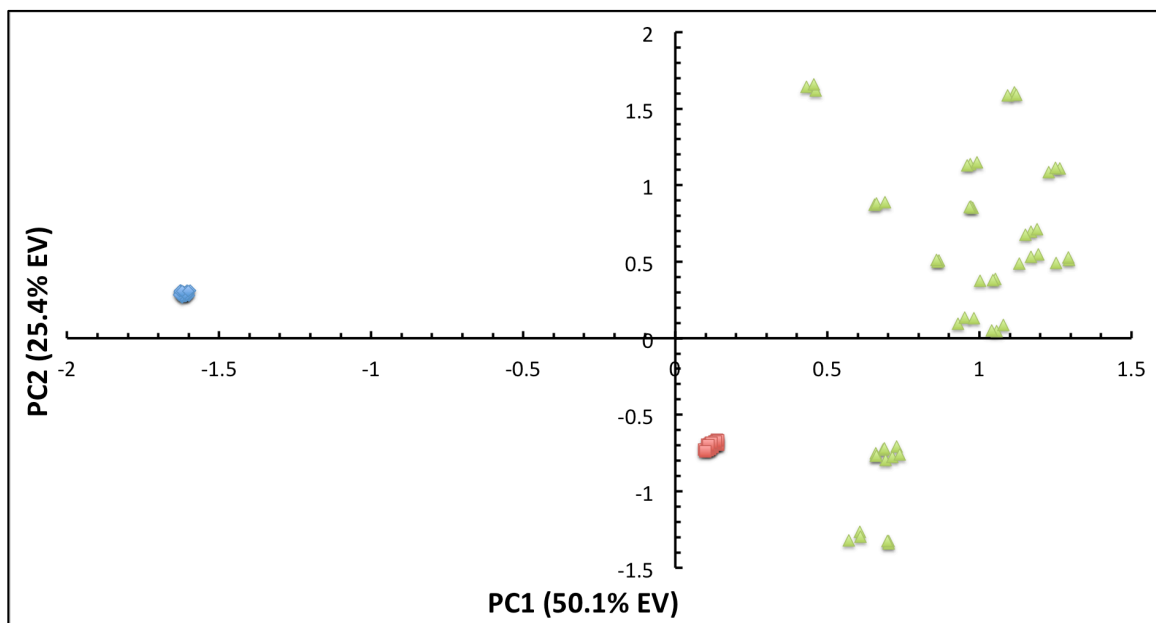

**Figure S3.** Muscle QC sample PCA score plot. MCM, muscle control material (red squares;  $n = 36$ ); NIST SRM 1946, standard reference material (blue diamonds;  $n = 33$ ). Technical replicate samples are displayed as green triangles.

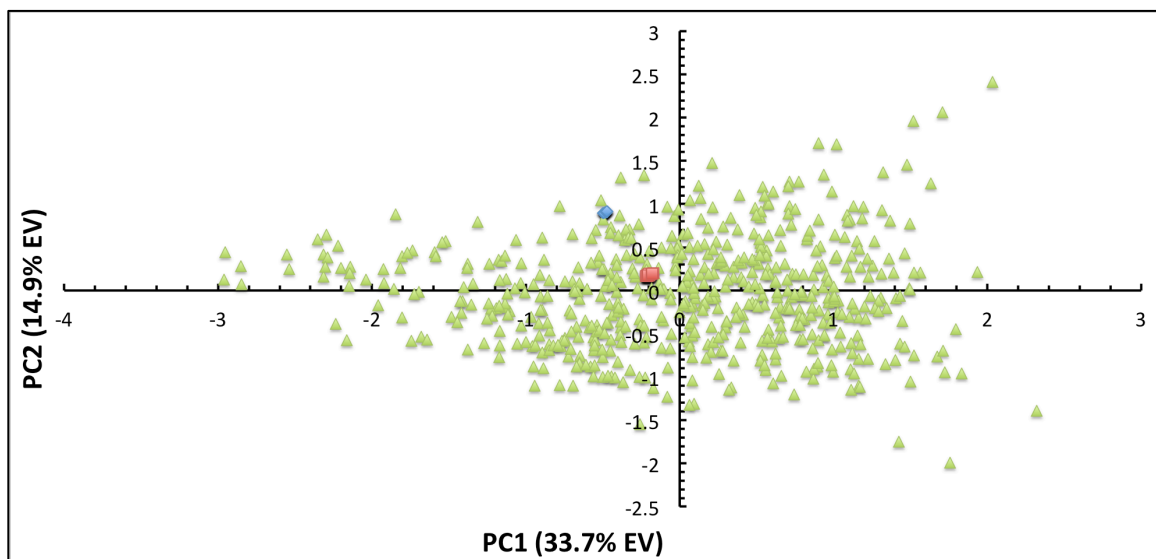

**Figure S4.** Plasma QC sample PCA score plot. CP, control plasma (red squares;  $n = 22$ ); NIST SRM 1950, standard reference material (blue diamonds;  $n = 19$ ). Experimental samples (green triangles;  $n = 571$ ) are also displayed.

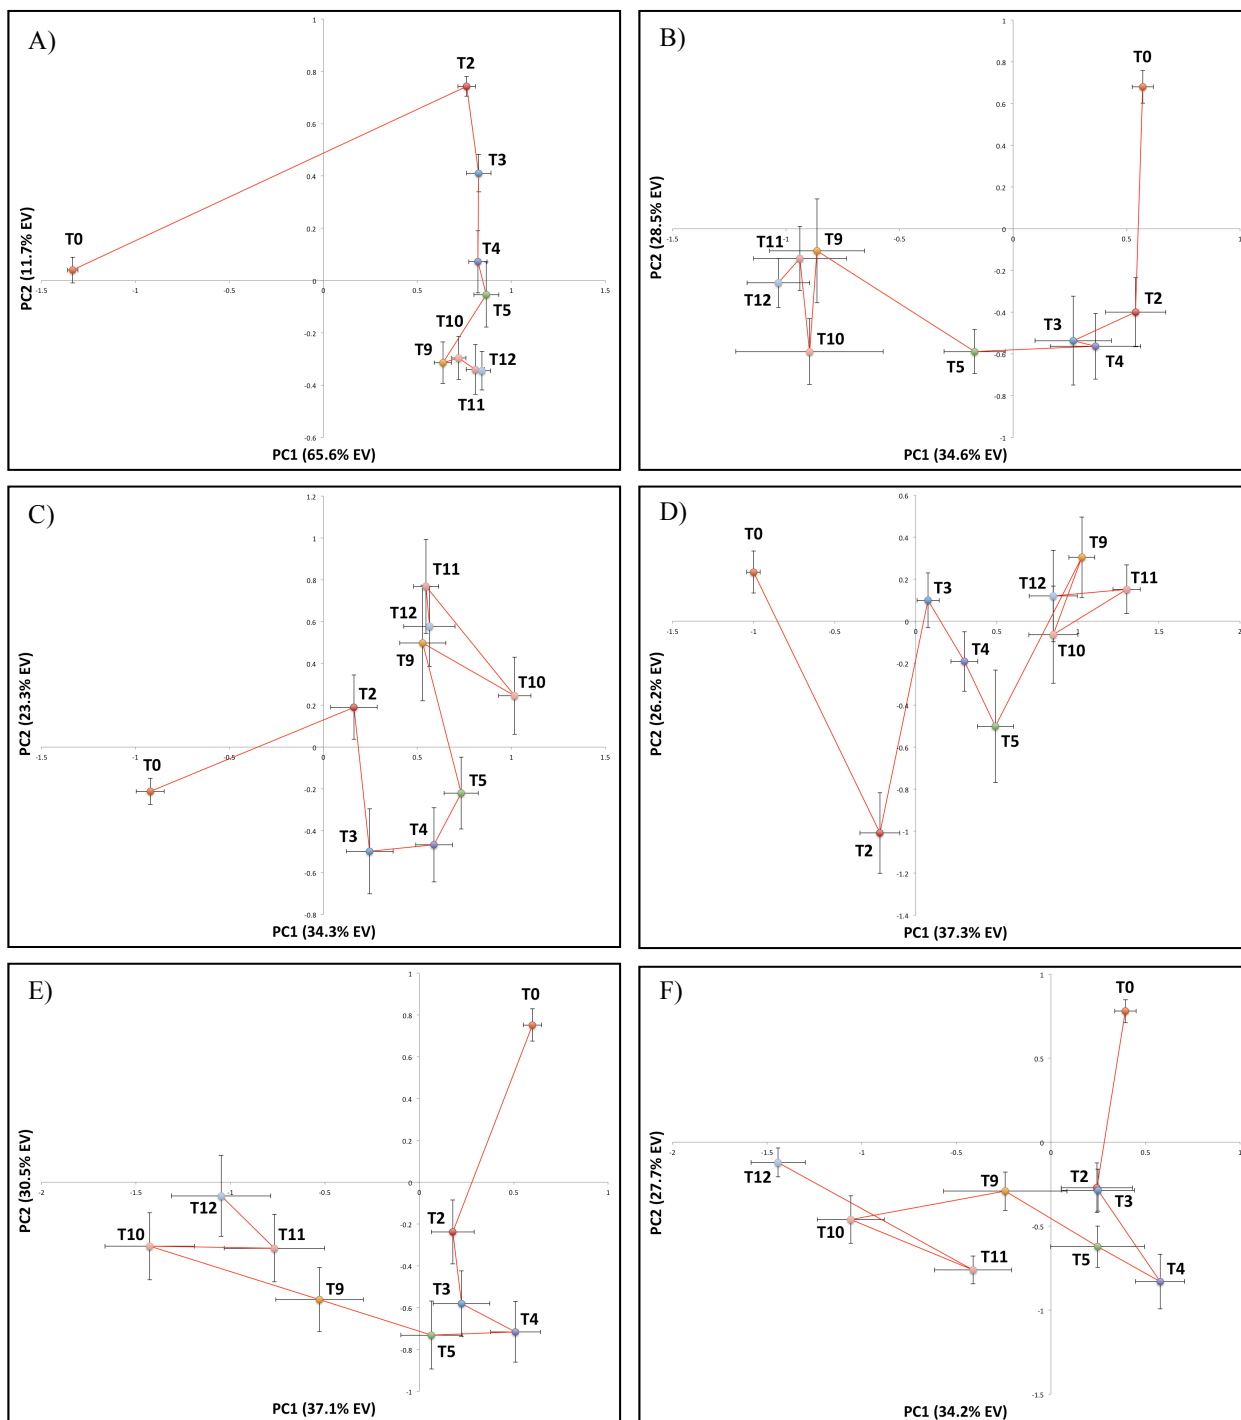

**Figure S5.** Unsupervised PCA score plots derived from  $^1\text{H}$  NOESY 1D NMR spectra from red drum muscle tissue (independent models). A) Natural diet; B) diet #1 (60 %

soybean meal); C) diet #2; D) diet #3; E) diet #4; F) diet #5. Sampled time points were  $T_0$  (at the end of the conditioning period),  $T_2$  to  $T_4$  and  $T_9$  to  $T_{12}$  for sampling at week 2 to week 4 and week 9 to week 12, respectively. Error bars represent the mean  $\pm$  1 SEM.

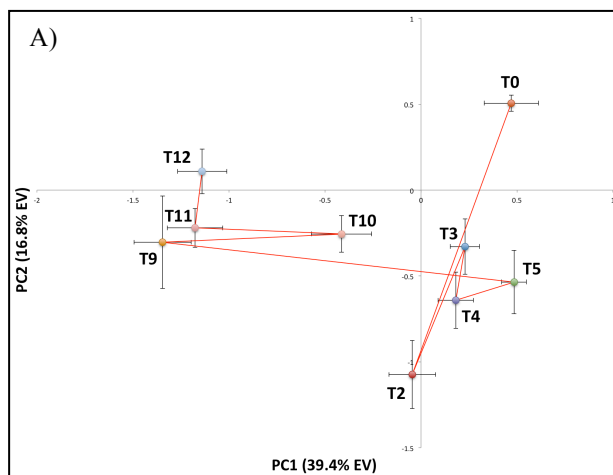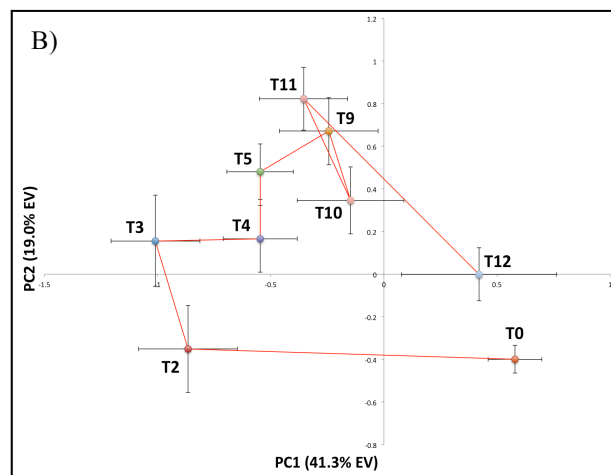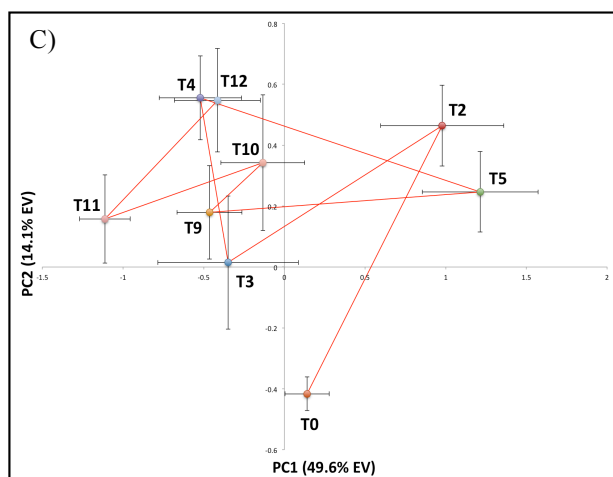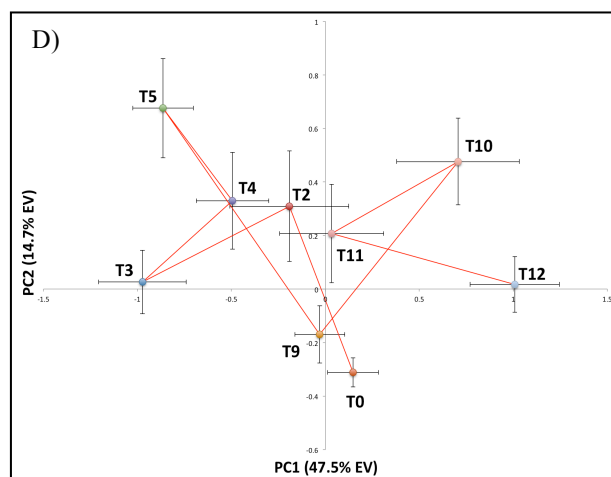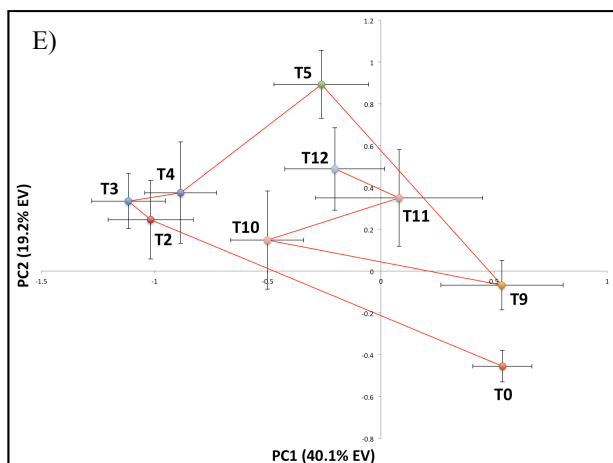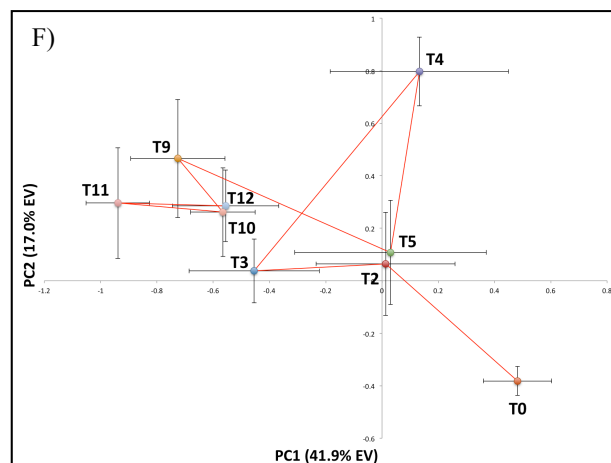

**Figure S6.** Unsupervised PCA score plots derived from  $^1\text{H}$  NOESY 1D NMR spectra from red drum plasma (independent models). A) Natural diet; B) diet #1 (60 % soybean meal); C) diet #2; D) diet #3; E) diet #4; F) diet #5. Sampled time points were  $T_0$  (at the end of the conditioning period),  $T_2$  to  $T_4$  and  $T_9$  to  $T_{12}$  for sampling at weeks 2 to week 4 and week 9 to week 12, respectively. Error bars represent the mean  $\pm$  1 SEM.

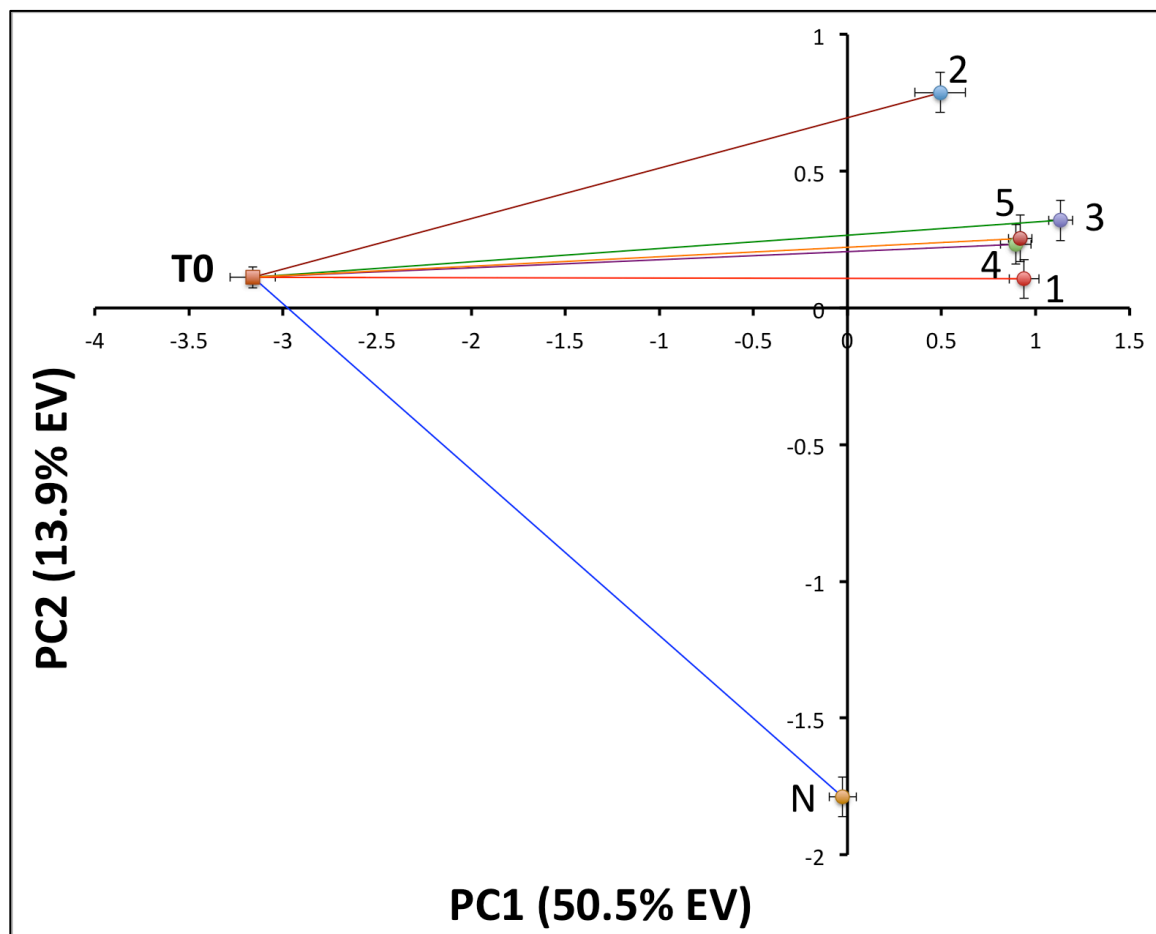

**Figure S7.** Liver PCA score plots for the five soy-based experimental diets (diet #1 to diet #5) and the natural diet (N) comparing  $T_0$  and  $T_{\text{end}}$  time points. Error bars represent the mean  $\pm$  1 SEM.



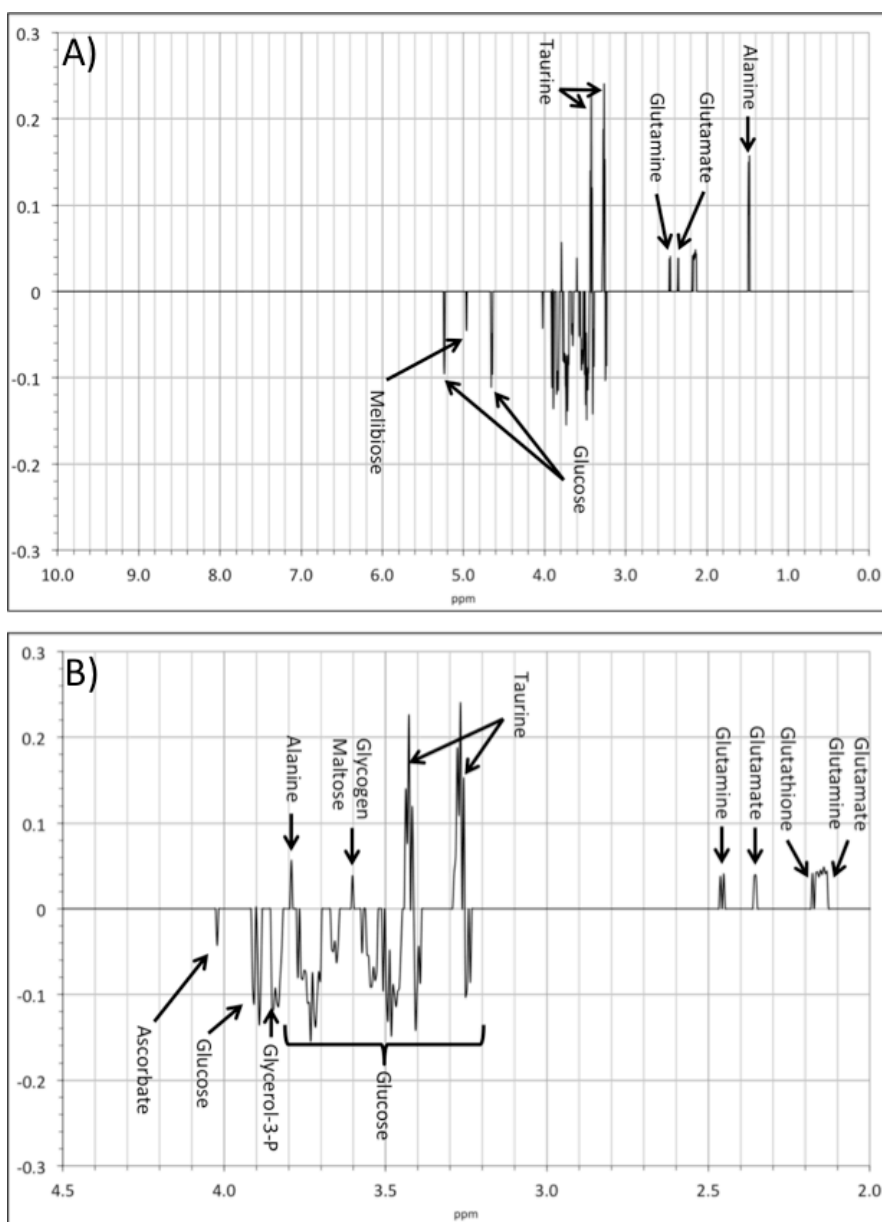

**Figure S8.** (A) Liver T<sub>0</sub>-T<sub>end</sub> PC1 loading plot (95<sup>th</sup> percentile) for the five experimental diets (diet #1 to diet #5) and the natural diet. (B) Expansion of the region 2.0 ppm to 4.5 ppm. Loadings with a negative sign indicate metabolites that are present at higher levels at T<sub>0</sub> and lower at T<sub>end</sub> and vice versa.

### Part III: Supporting Tables

**Table S1.** Composition of experimental diets for this study.

| Grams/100 grams                        | Conditioning | Diet #1 | Diet #2 | Diet #3 | Diet #4 | Diet #5 |
|----------------------------------------|--------------|---------|---------|---------|---------|---------|
| Soy Protein Concentrate 3              | 0.00         | 0.00    | 0.00    | 55.35   | 0.00    | 0.00    |
| Soy Protein Concentrate 4              | 0.00         | 0.00    | 0.00    | 0.00    | 47.20   | 0.00    |
| Soy Protein Concentrate 5 <sup>a</sup> | 0.00         | 0.00    | 0.00    | 0.00    | 0.00    | 50.41   |
| Soy Protein Concentrate 2 <sup>b</sup> | 0.00         | 0.00    | 43.10   | 0.00    | 0.00    | 0.00    |
| Soybean meal <sup>c</sup>              | 0.00         | 59.00   | 0.00    | 0.00    | 0.00    | 0.00    |
| Wheat flour <sup>d</sup>               | 36.42        | 11.38   | 27.93   | 13.48   | 22.42   | 20.32   |
| Wheat gluten meal                      | 0.00         | 5.90    | 3.80    | 5.30    | 4.57    | 4.46    |
| Poultry by-product meal                | 18.10        | 0.00    | 0.00    | 0.00    | 0.00    | 0.00    |
| Corn protein concentrate               | 18.10        | 0.00    | 0.00    | 0.00    | 0.00    | 0.00    |
| Blood meal                             | 5.00         | 0.00    | 0.00    | 0.00    | 0.00    | 0.00    |
| Menhaden oil <sup>e</sup>              | 10.20        | 12.75   | 14.20   | 14.35   | 14.45   | 13.42   |
| Squid meal, CSF                        | 4.08         | 4.08    | 4.08    | 4.08    | 4.08    | 4.08    |
| Lysine HCl                             | 2.40         | 1.68    | 1.61    | 1.95    | 1.60    | 1.87    |
| Methionine                             | 0.60         | 0.71    | 0.72    | 0.77    | 0.72    | 0.77    |
| Threonine                              | 0.80         | 0.30    | 0.26    | 0.47    | 0.26    | 0.47    |
| Mono-Dical phosphate                   | 2.40         | 2.30    | 2.40    | 2.35    | 2.40    | 2.30    |
| Vitamin premix <sup>f</sup>            | 1.00         | 1.00    | 1.00    | 1.00    | 1.00    | 1.00    |
| Choline CL                             | 0.60         | 0.60    | 0.60    | 0.60    | 0.60    | 0.60    |
| Vitamin C <sup>g</sup>                 | 0.20         | 0.20    | 0.20    | 0.20    | 0.20    | 0.20    |
| Trace min premix <sup>h</sup>          | 0.10         | 0.10    | 0.10    | 0.10    | 0.10    | 0.10    |
| <u>Formulated Composition, % as-is</u> |              |         |         |         |         |         |
| Crude Protein                          | 41.08        | 40.06   | 40.08   | 40.06   | 40.03   | 40.10   |
| Lipid                                  | 14.08        | 15.01   | 15.05   | 15.05   | 15.04   | 15.02   |
| Phosphorus                             | 0.92         | 0.90    | 0.90    | 0.91    | 0.91    | 0.92    |

<sup>a</sup> 560 g/kg crude protein.

<sup>b</sup> 693 g/kg crude protein.

<sup>c</sup> ADM, 468 g/kg crude protein

<sup>d</sup> Manildra Milling, 120 g/kg crude protein.

<sup>e</sup> Omega Proteins Inc., Virginia Prime menhaden oil .

<sup>f</sup> ARS 702; contributed, per kg diet; vitamin A 9650 IU; vitamin D 6600 IU; vitamin E 132 IU; vitamin K3 1.1 gm; thiamin mononitrate 9.1 mg; riboflavin 9.6 mg; pyridoxine hydrochloride 13.7 mg; pantothenate DL-calcium 46.5 mg; cyanocobalamin 0.03 mg; nicotinic acid 21.8 mg; biotin 0.34 mg; folic acid 2.5 mg; inositol 600 mg.

<sup>g</sup> Stay-C, 35%, DSM Nutritional Products.

**Table S2.** Proximate analyses for whole body. ANOVA ( $P = 0.05$ ) to test for significant differences between dietary treatments (natural diet excluded). Values reported as mean  $\pm$  1 S.D. Values with different superscripts are significantly different from one another.

| Diet     | Dry matter (%)                     | Protein (%)         | Fat (%)             | Ash (%)             | P (ppm)                            | K (ppm)                             | Ca (ppm)                           | Mg (ppm)          | Zn (ppm)          | Cu (ppm)           | Mn (ppm)          | Fe (ppm)           | S (ppm)            | Na (ppm)          |
|----------|------------------------------------|---------------------|---------------------|---------------------|------------------------------------|-------------------------------------|------------------------------------|-------------------|-------------------|--------------------|-------------------|--------------------|--------------------|-------------------|
| Diet #1  | 24.35<br>$\pm$ 0.01 <sup>a</sup>   | 73.18<br>$\pm$ 2.07 | 7.43<br>$\pm$ 2.29  | 16.53<br>$\pm$ 2.47 | 27200 $\pm$<br>2690 <sup>a,b</sup> | 12600 $\pm$<br>370 <sup>a,b,c</sup> | 49800 $\pm$<br>4820 <sup>a,b</sup> | 1510 $\pm$<br>149 | 48.4<br>$\pm$ 3.0 | 24.6<br>$\pm$ 12.9 | 20.1<br>$\pm$ 4.0 | 53.6<br>$\pm$ 10.7 | 9460<br>$\pm$ 906  | 6000<br>$\pm$ 663 |
| Diet #2  | 25.73<br>$\pm$ 0.01 <sup>a,b</sup> | 70.85<br>$\pm$ 4.29 | 9.77<br>$\pm$ 1.11  | 14.05<br>$\pm$ 1.58 | 24400 $\pm$<br>1380 <sup>a</sup>   | 12000 $\pm$<br>528 <sup>a</sup>     | 43100 $\pm$<br>4480 <sup>a</sup>   | 1430 $\pm$<br>82  | 43.8<br>$\pm$ 3.6 | 12.0<br>$\pm$ 4.5  | 16.6<br>$\pm$ 2.5 | 44.7<br>$\pm$ 5.9  | 9580<br>$\pm$ 329  | 5480<br>$\pm$ 299 |
| Diet #3  | 26.13<br>$\pm$ 0.01 <sup>b</sup>   | 76.35<br>$\pm$ 6.43 | 8.46<br>$\pm$ 1.85  | 15.54<br>$\pm$ 1.26 | 26800 $\pm$<br>1690 <sup>a,b</sup> | 12900 $\pm$<br>497 <sup>b,c</sup>   | 46100 $\pm$<br>4700 <sup>a,b</sup> | 1500 $\pm$<br>58  | 48.2<br>$\pm$ 3.0 | 18.3<br>$\pm$ 9.7  | 15.1<br>$\pm$ 1.7 | 46.2<br>$\pm$ 6.8  | 10200<br>$\pm$ 433 | 5480<br>$\pm$ 342 |
| Diet #4  | 25.08<br>$\pm$ 0.00 <sup>a,b</sup> | 76.69<br>$\pm$ 5.47 | 8.41<br>$\pm$ 1.26  | 15.05<br>$\pm$ 1.48 | 26100 $\pm$<br>2420 <sup>a,b</sup> | 13200 $\pm$<br>674 <sup>c</sup>     | 45100 $\pm$<br>6400 <sup>a,b</sup> | 1430 $\pm$<br>99  | 46.5<br>$\pm$ 5.4 | 15.7<br>$\pm$ 3.2  | 18.9<br>$\pm$ 2.6 | 49.8<br>$\pm$ 12.9 | 10300<br>$\pm$ 354 | 5840<br>$\pm$ 307 |
| Diet #5  | 26.03<br>$\pm$ 0.01 <sup>b</sup>   | 70.88<br>$\pm$ 3.43 | 10.61<br>$\pm$ 1.52 | 15.96<br>$\pm$ 2.47 | 29500 $\pm$<br>2040 <sup>b</sup>   | 12400 $\pm$<br>571 <sup>a,b</sup>   | 52500 $\pm$<br>6590 <sup>b</sup>   | 1590 $\pm$<br>123 | 49.2<br>$\pm$ 2.8 | 16.6<br>$\pm$ 5.8  | 15.5<br>$\pm$ 3.6 | 50.8 $\pm$<br>9.8  | 9650<br>$\pm$ 548  | 5560<br>$\pm$ 656 |
| Natural  | 28.15<br>$\pm$ 0.00                | 66.49<br>$\pm$ 2.84 | 12.34<br>$\pm$ 1.26 | 15.74<br>$\pm$ 1.00 | 29000 $\pm$<br>1740                | 11100 $\pm$<br>582                  | 49800 $\pm$<br>4070                | 1540 $\pm$<br>67  | 43.6<br>$\pm$ 2.7 | 15.5<br>$\pm$ 6.8  | 6.7<br>$\pm$ 0.9  | 37.9<br>$\pm$ 5.2  | 8290<br>$\pm$ 422  | 4220<br>$\pm$ 215 |
| <i>P</i> | 0.007                              | 0.059               | 0.059               | 0.316               | 0.006                              | 0.001                               | 0.041                              | 0.080             | 0.175             | 0.176              | 0.059             | 0.450              | 0.055              | 0.364             |

**Table S3.** Proximate analyses for fillets. ANOVA ( $P = 0.05$ ) to test for significant differences between dietary treatments (natural diet excluded). Values reported as mean  $\pm$  1 S.D. Values with different superscripts are significantly different from one another.

| Diet     | Dry matter (%)      | Protein (%)                      | Fat (%)            | Ash (%)                        | P (ppm)            | K (ppm)             | Ca (ppm)           | Mg (ppm)          | Zn (ppm)           | Cu (ppm)           | Mn (ppm)           | Fe (ppm)           | S (ppm)             | Na (ppm)          |
|----------|---------------------|----------------------------------|--------------------|--------------------------------|--------------------|---------------------|--------------------|-------------------|--------------------|--------------------|--------------------|--------------------|---------------------|-------------------|
| Diet #1  | 24.62<br>$\pm$ 0.04 | 87.59<br>$\pm$ 1.31 <sup>a</sup> | 1.00<br>$\pm$ 0.12 | 4.77 $\pm$ 0.21 <sup>a</sup>   | 9400<br>$\pm$ 276  | 19110<br>$\pm$ 348  | 784<br>$\pm$ 408   | 1370<br>$\pm$ 66  | 28.4<br>$\pm$ 4.4  | 50.1<br>$\pm$ 101  | 1.99               | 64.3<br>$\pm$ 107  | 11700<br>$\pm$ 426  | 1700<br>$\pm$ 467 |
| Diet #2  | 22.79<br>$\pm$ 0.04 | 87.56<br>$\pm$ 2.07 <sup>a</sup> | 1.10<br>$\pm$ 0.27 | 4.55 $\pm$ 0.21 <sup>b</sup>   | 7310<br>$\pm$ 3440 | 14300<br>$\pm$ 6905 | 542<br>$\pm$ 250   | 1070<br>$\pm$ 502 | 20.4<br>$\pm$ 9.7  | 6.15<br>$\pm$ 5.53 | < 1.00             | 25.4<br>$\pm$ 19.0 | 8410<br>$\pm$ 3930  | 1230<br>$\pm$ 586 |
| Diet #3  | 24.31<br>$\pm$ 0.06 | 95.41<br>$\pm$ 1.72 <sup>b</sup> | 0.62<br>$\pm$ 0.22 | 5.14 $\pm$ 0.17 <sup>a,b</sup> | 9960<br>$\pm$ 564  | 18700<br>$\pm$ 652  | 876<br>$\pm$ 262   | 1470<br>$\pm$ 72  | 29.2<br>$\pm$ 4.2  | 7.59<br>$\pm$ 2.99 | 1.27<br>$\pm$ 0.13 | 41.8<br>$\pm$ 13.4 | 11800<br>$\pm$ 1160 | 1750<br>$\pm$ 115 |
| Diet #4  | 21.93<br>$\pm$ 0.05 | 86.65<br>$\pm$ 2.07 <sup>a</sup> | 0.82<br>$\pm$ 0.04 | 5.20 $\pm$ 0.19 <sup>a</sup>   | 10000<br>$\pm$ 535 | 19200<br>$\pm$ 504  | 1610<br>$\pm$ 1240 | 1430<br>$\pm$ 92  | 30.2<br>$\pm$ 10.1 | 13.5<br>$\pm$ 6.6  | 1.41<br>$\pm$ 0.01 | 53.6<br>$\pm$ 24.2 | 12600<br>$\pm$ 190  | 1930<br>$\pm$ 416 |
| Diet #5  | 23.89<br>$\pm$ 0.02 | 86.36<br>$\pm$ 1.12 <sup>a</sup> | 1.02<br>$\pm$ 0.28 | 5.56 $\pm$ 1.58 <sup>a,b</sup> | 9520               | 18300               | 438                | 1280              | 22.2               | 9.13               | 2.10               | 71.1               | 10800               | 1340              |
| Natural  | 23.82<br>$\pm$ 0.01 | 85.86<br>$\pm$ 2.18              | 1.60<br>$\pm$ 0.58 | 5.16 $\pm$ 0.18                | 9540<br>$\pm$ 257  | 17700<br>$\pm$ 720  | 911<br>$\pm$ 726   | 1250<br>$\pm$ 37  | 21.6<br>$\pm$ 3.6  | 16.0<br>$\pm$ 6.3  | 2.62<br>$\pm$ 1.63 | 63.4<br>$\pm$ 36.8 | 10700<br>$\pm$ 382  | 1280<br>$\pm$ 174 |
| <i>P</i> | 0.865               | 0.0001                           | 0.588              | 0.011                          | 0.274              | 0.328               | 0.132              | 0.273             | 0.259              | 0.727              | n/a                | 0.867              | 0.143               | 0.267             |

**Table S4.** Production characteristics from the feeding trial. ANOVA ( $P = 0.05$ ) to test for significant differences between dietary treatments. Natural diet feed consumption is wet weight and excluded from the ANOVA analysis. Values for the different parameters represent the mean  $\pm$  SD of the fish sampled. Values with different letter superscripts are significantly different from one another.

| Diet     | Feed consumption (g/fish)   | Weight gain (g) | Final weight (g) | Final length (mm) | FCR <sup>1</sup>             | PER <sup>2</sup>             | SGR <sup>3</sup> | Condition factor <sup>4</sup> |
|----------|-----------------------------|-----------------|------------------|-------------------|------------------------------|------------------------------|------------------|-------------------------------|
| Diet #1  | 152 $\pm$ 6 <sup>a,b</sup>  | 55 $\pm$ 17     | 145 $\pm$ 16     | 241 $\pm$ 26      | 2.99 $\pm$ 1.06              | 0.82 $\pm$ 0.23              | 0.57 $\pm$ 0.15  | 0.99 $\pm$ 0.12               |
| Diet #2  | 123 $\pm$ 17 <sup>a</sup>   | 74 $\pm$ 24     | 164 $\pm$ 30     | 239 $\pm$ 22      | 1.80 $\pm$ 0.50              | 1.36 $\pm$ 0.32              | 0.70 $\pm$ 0.16  | 1.06 $\pm$ 0.13               |
| Diet #3  | 140 $\pm$ 12 <sup>a,b</sup> | 89 $\pm$ 24     | 179 $\pm$ 25     | 258 $\pm$ 16      | 1.64 $\pm$ 0.35              | 1.37 $\pm$ 0.29              | 0.81 $\pm$ 0.15  | 1.08 $\pm$ 0.06               |
| Diet #4  | 157 $\pm$ 16 <sup>b</sup>   | 84 $\pm$ 39     | 177 $\pm$ 38     | 247 $\pm$ 27      | 2.20 $\pm$ 0.94              | 1.23 $\pm$ 0.46              | 0.74 $\pm$ 0.27  | 1.03 $\pm$ 0.05               |
| Diet #5  | 137 $\pm$ 13 <sup>a,b</sup> | 75 $\pm$ 18     | 166 $\pm$ 18     | 255 $\pm$ 14      | 1.91 $\pm$ 0.46              | 1.18 $\pm$ 0.28              | 0.71 $\pm$ 0.14  | 1.05 $\pm$ 0.07               |
| Natural  | 1201 $\pm$ 3                | 308 $\pm$ 28    | 398 $\pm$ 28     | 319 $\pm$ 18      | 1.30 $\pm$ 0.13 <sup>5</sup> | 1.05 $\pm$ 0.09 <sup>5</sup> | 1.78 $\pm$ 0.09  | 1.21 $\pm$ 0.05               |
| <i>P</i> | 0.021                       | 0.449           | 0.432            | 0.169             | 0.117                        | 0.174                        | 0.479            | 0.150                         |

<sup>1</sup>Feed conversion ratio (FCR, *dry feed/gain*) =  $I / (W_f - W_i)$ , where  $W_f$  = final body weight (g), and  $W_i$  = initial body weight (g) of red drum;  $I$  (g) is the total amount of dry feed fed.

<sup>2</sup>Protein efficiency ratio (PER) =  $W \text{ gain (g) / protein intake (g)}$ .

<sup>3</sup>Specific growth rate (SGR) =  $[(\ln(W_f) - \ln(W_i)) \times 100 / t]$ , where  $\ln(W_f)$  = natural log of the final wet weight of red drum,  $\ln(W_i)$  = natural log of the initial wet weight of red drum, and  $t$  is the duration of the feeding trial in days.

<sup>4</sup>Condition factor ( $K$ ,  $g/cm^3$ ) =  $100 \times (W_f / L_s^3)$ , where  $W_f$  (g) and  $L_s$  (cm) are the final body weight and body length, respectively.

<sup>5</sup>FCR and PER for natural diet calculated using dry weight of natural feed items (assuming 67% water content – derived from average weight of oven dried natural feed items).

**Table S5.** Eviscerated fish weight (g) and hepatosomatic index (HSI) at final sampling. ANOVA ( $P = 0.05$ ) to test for significant differences between dietary treatments (natural diet excluded). Values reported as mean  $\pm$  1 S.D. Values with different letter superscripts are significantly different from one another.

| Diet     | Eviscerated Weight (g) | Hepatosomatic Index <sup>1</sup> |
|----------|------------------------|----------------------------------|
| Diet #1  | 132.50 $\pm$ 52.64     | 0.94 $\pm$ 0.23 <sup>a</sup>     |
| Diet #2  | 137.17 $\pm$ 46.93     | 1.38 $\pm$ 0.44 <sup>b</sup>     |
| Diet #3  | 170.33 $\pm$ 32.22     | 1.04 $\pm$ 0.22 <sup>a</sup>     |
| Diet #4  | 147.33 $\pm$ 49.42     | 1.01 $\pm$ 0.21 <sup>a</sup>     |
| Diet #5  | 161.17 $\pm$ 31.13     | 1.25 $\pm$ 0.26 <sup>a,b</sup>   |
| Natural  | 366.00 $\pm$ 71.37     | 1.14 $\pm$ 0.18                  |
| <i>P</i> | 0.183                  | 0.002                            |

<sup>1</sup>Hepatosomatic index (HSI) = [liver  $W$  (g)/ body  $W$  (g)] x 100.

**Table S6.** Quantiles of % RSD derived from QC sample NMR spectra. CP, control plasma; LCM, liver control material; MCM, muscle control material; SRM, standard reference material.

| Level                          | Minimum | 10%   | 25%   | Median | 75%    | 90%    | Maximum |
|--------------------------------|---------|-------|-------|--------|--------|--------|---------|
| CP <sup>1</sup>                | 0.528   | 1.694 | 2.712 | 5.043  | 10.218 | 17.453 | 39.438  |
| LCM <sup>2</sup>               | 1.479   | 3.403 | 4.504 | 7.061  | 10.837 | 16.025 | 41.351  |
| MCM <sup>3</sup>               | 1.114   | 2.243 | 3.490 | 7.641  | 13.938 | 20.492 | 137.594 |
| SRM <sup>4</sup> 1946 (Liver)  | 0.777   | 2.732 | 4.513 | 8.913  | 17.136 | 23.134 | 67.503  |
| SRM <sup>4</sup> 1946 (Muscle) | 0.701   | 2.122 | 3.662 | 7.275  | 13.306 | 21.100 | 96.500  |
| SRM <sup>4</sup> 1950 (Plasma) | 0.312   | 1.495 | 2.539 | 5.109  | 10.607 | 18.369 | 49.332  |

<sup>1</sup>CP = Control Plasma.

<sup>2</sup>LCM = Liver Control Material.

<sup>3</sup>MCM = Muscle Control Material.

<sup>4</sup>SRM = Standard Reference Material.

**Table S7.** Significant metabolites identified in the PCA liver and muscle models for the five experimental diets (diets #1 to diet #5) and the natural diet by comparing the T<sub>0</sub> and T<sub>end</sub> time points (see liver the score plot (Figure S7) and related loading plot (Figures S8 and S9)). Compound identity was confirmed using <sup>1</sup>H, 2D JRES and <sup>1</sup>H, <sup>13</sup>C HSQC spectra.

| Metabolites          | <sup>1</sup> H and <sup>13</sup> C Chemical shift (ppm), multiplicities and J <sub>HH</sub> couplings (Hz)                                                                                                                                                                                                                                                                                                                                                                                                | Tissue |
|----------------------|-----------------------------------------------------------------------------------------------------------------------------------------------------------------------------------------------------------------------------------------------------------------------------------------------------------------------------------------------------------------------------------------------------------------------------------------------------------------------------------------------------------|--------|
| Alanine              | ( <u>1.48</u> (d, J = 7.2 Hz), 19.0), (3.78 (q, J = 7.2 Hz), 53.3)                                                                                                                                                                                                                                                                                                                                                                                                                                        | L      |
| Ascorbate            | (3.74 (m), 65.3), (4.02 (m), 72.4), ( <u>4.52</u> (d, J = 2.3 Hz), 81.3)                                                                                                                                                                                                                                                                                                                                                                                                                                  | L      |
| Glucose              | (3.25 (dd, J <sub>1</sub> = 9.3 Hz, J <sub>2</sub> = 7.9 Hz), 77.0), (3.41 (m), 72.5), (3.46 (m), 78.7), (3.48 (t, J = 9.3 Hz), 78.7), (3.54, (dd, J <sub>1</sub> = 10.0 Hz, J <sub>2</sub> = 3.9 Hz), 74.3), (3.72 (m), 75.6), (3.72 (m), 63.6), (3.78 (dd, J <sub>1</sub> = 14.4, J <sub>2</sub> = 7.0 Hz), 63.4), (3.84 (m), 74.3), (3.84 (m), 63.4), (3.90 (dd, J <sub>1</sub> = 12.4 Hz, J <sub>2</sub> = 2.4 Hz), 63.6), ( <u>4.65</u> (d, J = 7.7 Hz), 98.8), ( <u>5.24</u> (d, J = 3.8 Hz), 94.9) | L      |
| Glutamate            | ( <u>2.06</u> (m), 29.8), (2.13 (m), 29.8), ( <u>2.35</u> (m), 36.3), (3.76 (dd, J <sub>1</sub> = 6.9 Hz, J <sub>2</sub> = 4.7 Hz), 57.4)                                                                                                                                                                                                                                                                                                                                                                 | L      |
| Glutamine            | (2.15 (m), 29.1), ( <u>2.46</u> (m), 33.7), (3.78 (t, J = 6.3 Hz), 57.0)                                                                                                                                                                                                                                                                                                                                                                                                                                  | L      |
| Glutathione          | (2.17 (m), 29.0), (2.56 (m), 34.2), (2.96 (m), 28.3), (3.30, 41.6), (3.32, 41.6), (3.78 (m), 46.2), (3.79 (m), 57.0), ( <u>4.57</u> (dd, J <sub>1</sub> = 7.3 Hz, J <sub>2</sub> = 5.1 Hz), 58.6), (4.76, 55.5)                                                                                                                                                                                                                                                                                           | L      |
| Glycerol 3-phosphate | (3.62 (dd, J <sub>1</sub> = 11.6 Hz, J <sub>2</sub> = 5.9 Hz), 65.0), (3.68 (dd, J <sub>1</sub> = 11.5 Hz, J <sub>2</sub> = 4.7 Hz), 65.1), ( <u>3.78</u> (m), 73.9), ( <u>3.80</u> (m), 67.7), (3.83 (m), 67.7), (3.84 (m), 74.0), (3.88 (m), 74.0), (3.89 (m), 74.0)                                                                                                                                                                                                                                    | L      |
| Glycogen             | (3.47 (m), 72.4), (3.66 (m), 79.7), (3.77 (m), 75.8), (3.87 (m), 63.3), (3.96 (dd, J <sub>1</sub> = 10.0 Hz, J <sub>2</sub> = 8.6 Hz), 76.1), (3.98 (dd, J <sub>1</sub> = 10.8 Hz, J <sub>2</sub> = 8.5 Hz), 76.1), ( <u>5.40</u> (d, J = 3.8 Hz), 102.4), ( <u>5.41</u> (d, J = 4.5 Hz), 102.4)                                                                                                                                                                                                          | L      |
| 4-Hydroxyproline     | (2.15 (m), 40.2), (2.44 (m), 40.2), (3.37 (t, J = 1.9 Hz), 55.7), (3.38 (t, J = 1.9 Hz), 55.7), (3.48 (dd, J <sub>1</sub> = 11.5 Hz, J <sub>2</sub> = 3.8 Hz), 55.8), (3.50 (dd, J <sub>1</sub> = 12.4 Hz, J <sub>2</sub> = 3.6 Hz), 55.8), ( <u>4.35</u> (ddd, J <sub>1</sub> = 10.8 Hz, J <sub>2</sub> = 7.7 Hz, J <sub>3</sub> = 1.1 Hz), 62.6), (4.67 (m), 72.9)                                                                                                                                      | M      |
| Lactate              | (1.33 (d, J = 7.0 Hz), 22.8), (4.11 (q, J = 7.0 Hz), 71.3)                                                                                                                                                                                                                                                                                                                                                                                                                                                | M      |
| Maltose              | (3.23, 56.9), (3.28, 77.0), (3.43, 72.6), (3.58, 74.3), (3.60, 77.4), (3.65, 79.5), (3.72, 75.3), (3.75, 63.4), (3.78, 79.0), (3.80, 63.3), (3.84, 63.3), (3.90, 63.4), (3.94 (m), 72.8), (3.98 (t, J = 9.1 Hz), 76.0), ( <u>4.64</u> (d), 98.6), (5.24 (d), 94.8), ( <u>5.42</u> (d, 3.8 Hz), 102.3)                                                                                                                                                                                                     | L      |
| Melibiose            | (3.49, 78.7), (3.50, 72.3), (3.53, 72.3), (3.54, 75.5), (3.64, 77.2), (3.77, 68.5), (3.82, 70.7), (3.96 (m), 68.5), ( <u>4.96</u> (m), 100.8)                                                                                                                                                                                                                                                                                                                                                             | L      |
| Proline              | ( <u>2.01</u> (m), 26.6), ( <u>2.08</u> (m), 31.8), (2.35 (m), 31.8), (3.34 (m), 48.9), (3.42, 48.8), (4.14 (dd, J <sub>1</sub> = 8.1 Hz, J <sub>2</sub> = 5.8 Hz), 64.0)                                                                                                                                                                                                                                                                                                                                 | M      |
| Taurine              | (3.27 (t, J = 6.7 Hz), 50.4), ( <u>3.42</u> (t, J = 6.7 Hz), 38.1)                                                                                                                                                                                                                                                                                                                                                                                                                                        | L, M   |

Chemical shifts were referenced to the internal standard TMSP δ<sup>1</sup>H 0.00. Key: s, singlet; d, doublet; dd, doublet of doublets; t, triplet; m, multiplet. L, Liver; M, Muscle. Underlined chemical shifts indicate well-isolated signals used in metabolite level determination via bin intensities.
